# Supplementary material for: Neuropeptide Neuromedin B does not alter body weight and glucose homeostasis nor does it act as an insulin-releasing peptide
Source: PubMed Central journal article supplement (PMC9174263; doi:10.1038/s41598-022-13060-0), 2022-06-07
Supplement: 41598_2022_13060_MOESM2_ESM.pdf [file 41598_2022_13060_MOESM2_ESM.pdf]

# Supplementary Figure 2

A

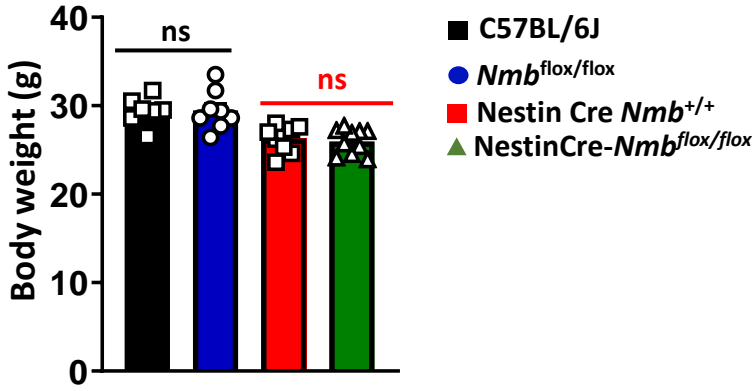

B

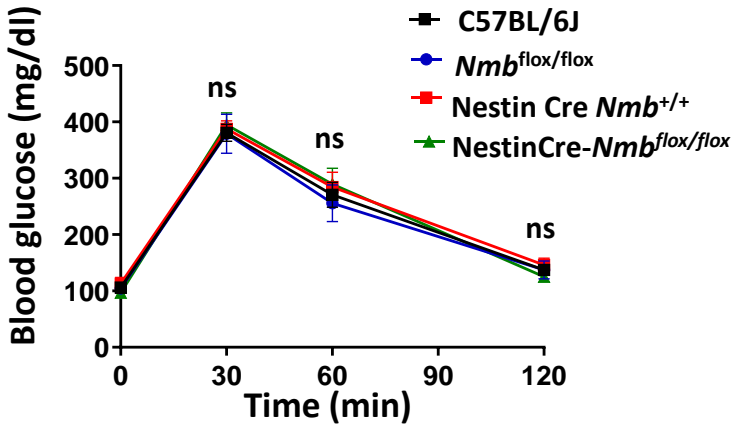

C

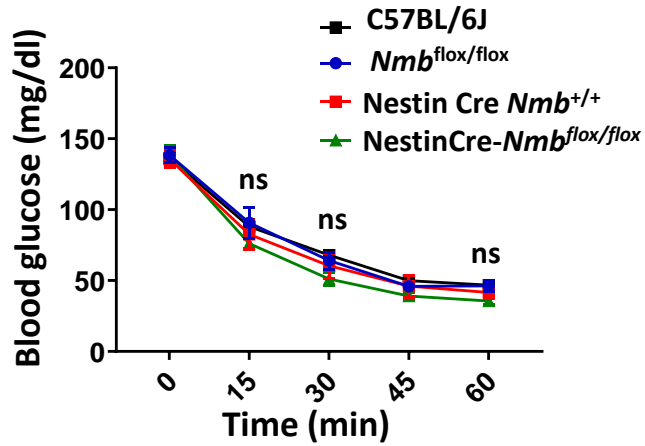

## Supplementary Figure 2:

A) Body weight of 6 month old *Nmb*<sup>flox/flox</sup> and C57BL/6J mice on standard diet. Each dot represents individual mice. (B-C) Intraperitoneal glucose tolerance test (IP GTT) and intraperitoneal insulin tolerance test (ITT) of 6 month old *Nmb*<sup>flox/flox</sup> and C57BL/6J mice on standard diet. n=6-8 mice per group. Data are shown as means  $\pm$  SEM. For statistical analysis, unpaired Student t-test and two-way ANOVA followed by Bonferroni's post-hoc test. ns- non significant;
