# Supplementary material for: Neuropeptide Neuromedin B does not alter body weight and glucose homeostasis nor does it act as an insulin-releasing peptide
Source: PubMed Central journal article supplement (PMC9174263; doi:10.1038/s41598-022-13060-0), 2022-06-07
Supplement: 41598_2022_13060_MOESM3_ESM.pdf [file 41598_2022_13060_MOESM3_ESM.pdf]

# Supplementary Figure 3

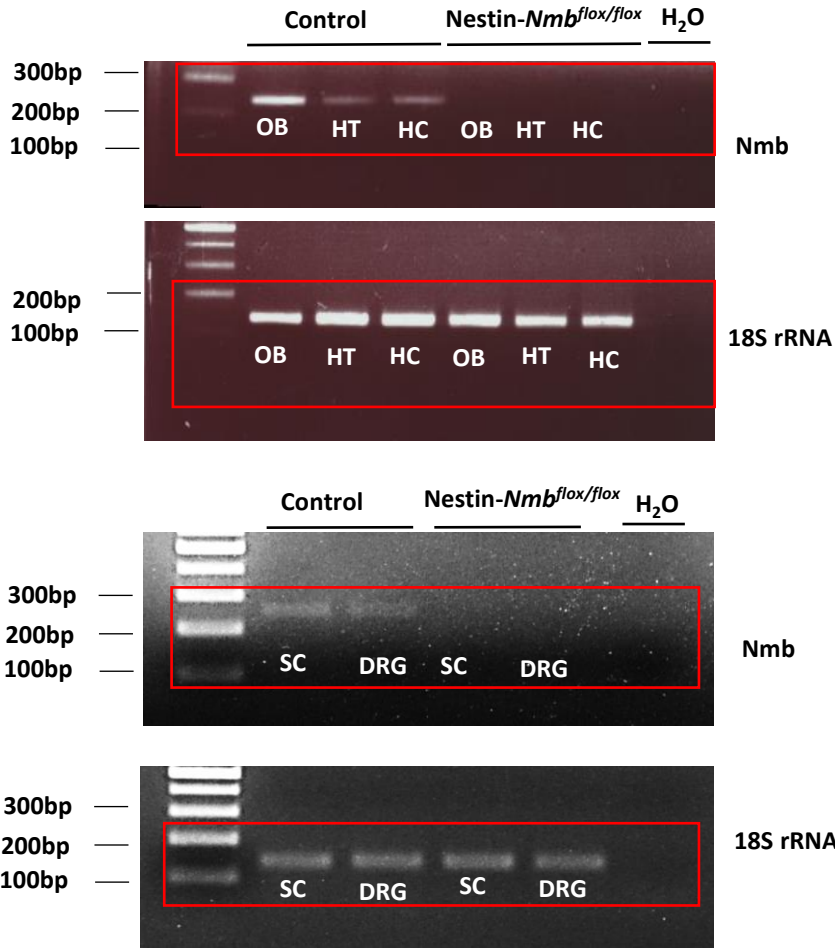

## Supplementary Figure 3:

Uncropped gel images used in the manuscript
